# Supplementary material for: Tracer experiment and model evidence for macrofaunal shaping of microbial nitrogen functions along rocky shores
Source: Copernicus journal article supplement (doi:10.5194/bg-2016-81), 2016-03-15

1 **Tracer experiment and model evidence for macrofaunal shaping of microbial**  
2 **nitrogen functions along rocky shores**

3 Catherine A. Pfister<sup>1</sup>, Mark A. Altabet<sup>2</sup>, Santhiska Pather<sup>2</sup>, Greg Dwyer<sup>1</sup>

4

5 <sup>1</sup> Department of Ecology and Evolution, University of Chicago, Chicago IL, USA

6 <sup>2</sup> School for Marine Sciences and Technology, University of Massachusetts, Dartmouth,

7 Bedford, MA, USA

8 Correspondence to: C. A. Pfister (cpfister@uchicago.edu)

9

10

11

12

13

14

15

16

17

18 | [Revised 16 May 2016 for Biogeosciences](#)

19

20

21

22

23

24 | **Abstract.** [Seawater microbes as well as those associated with macrobiota are](#) increasingly  
25 | recognized as a key feature affecting nutrient cycling. Tidepools are ideal natural mesocosms to  
26 | test macrofauna and microbe interactions, and we quantified rates of microbial nitrogen  
27 | processing using tracer enrichment of ammonium ( $^{15}\text{N}_{\text{NH}_4}$ ) or nitrate ( $^{15}\text{N}_{\text{NO}_3}$ ) when tidepools  
28 | were isolated from the ocean during low intertidal periods. Experiments were conducted during  
29 | both day and night as well as in control tidepools and those from which mussels had been  
30 | removed allowing us to determine the role of both [mussels](#) and daylight in microbial nitrogen  
31 | processing. We paired time-series observations of  $^{15}\text{N}$  enrichment in  $\text{NH}_4^+$ ,  $\text{NO}_2^-$ , and  $\text{NO}_3^-$  with  
32 | a differential equation model to quantify multiple, simultaneous nitrogen transformations.  
33 | Mussel presence and daylight increased remineralization and photosynthetic nitrogen uptake.  
34 | When we compared ammonium gain or loss that was attributed to [any tidepool](#) microbes versus  
35 | photosynthetic uptake, microbes accounted for 32% of this ammonium flux on average.  
36 | Microbial transformations averaged 61% of total nitrate use; thus, microbial activity was almost  
37 | 3 times photosynthetic nitrate uptake. Because it accounted for processes that diluted our tracer,  
38 | our differential equation model assigned higher rates of nitrogen processing compared to prior  
39 | source-product models. Our in situ experiments showed that animals alone elevate microbial  
40 | nitrogen transformations two orders of magnitude, suggesting that coastal macrobiota are key  
41 | players in complex microbial nitrogen transformations.

42

43 | Keywords: tide pools, enrichment experiment, *Mytilus californianus*, differential equation  
44 | model, nitrification, nutrient fluxes

45

46

47 **1. Introduction**

48 Nitrogen cycle processes are carried out by a diversity of taxa, from microbes to macrofauna,  
49 that can all reside in the same habitat. Nevertheless, most studies tend to focus on characterizing  
50 and/or measuring the rate of only a single transformation at a time (e.g. nitrification or nitrate  
51 reduction), despite the co-occurrence of a diversity of nitrogen processes including those leading  
52 to loss or retention. Given an anthropogenic doubling over the past century of the supply rate of  
53 biologically available nitrogen to ecosystems (Galloway et al. 2008, Fowler et al. 2013)  
54 simultaneous with accelerated harvest of animals that recycle nitrogen (Worm et al. 2006,  
55 Maranger et al. 2008), it is essential that we understand [how](#) microbes and macrobiota [interact](#) to  
56 [influence](#) nitrogen cycling. Using the experimental tractability of rocky shore tidepools as  
57 natural mesocosms, coupled with isotope tracer enrichments and mathematical modeling, we  
58 estimate here the rate of simultaneous nitrogen transformations as a function of animal  
59 abundance and time of day.

60

61 Along upwelling shores, the paradigm of productivity driven by upwelled nitrate has been  
62 challenged by studies quantifying the effects of animal excretion and regeneration (Dugdale and  
63 Goering 1967, Aquilino et al. 2009, Pather et al. 2014). It is well known that nitrogen  
64 regeneration is quantitatively significant in a variety of ecosystems (Schindler et al. 2001, Vanni  
65 2002, [Allgeier et al. 2014](#), Subalusky et al. 2014), However, to make a significant contribution to  
66 productivity, uptake of animal excreted ammonium by photo- and chemolithotrophs needs to be  
67 sufficiently rapid to retain nitrogen locally to avoid dispersion into the larger environment.

68

69 Microbial nitrogen transformations are diverse, converting inorganic nitrogen among different  
70 biologically available ( $\text{NH}_4^+$ ,  $\text{NO}_2^-$ , or  $\text{NO}_3^-$ ) or unavailable ( $\text{N}_2$ ) forms. Accordingly, the  
71 relative importance of these pathways also influences the retention or loss of regenerated  
72 nitrogen. In coastal environments, there is increasing documentation that microbial nitrogen  
73 transformation (e.g. chemolithotrophs) is intimately associated with animals (Welsh and  
74 Castadelli 2004, Pfister et al. 2010, Heisterkamp et al. 2013, Stief 2013). Rapid use of animal-  
75 regenerated ammonium is likely by both obligate ammonia oxidizing microbes (e.g. Ward 2008)  
76 as well as phototrophs that prefer it for energetic reasons (Magalhães et al. 2003, Zehr and  
77 Kudela 2011). Accordingly, ammonium production by animals may be an important contributor  
78 to the productivity along rocky shores of the northeast Pacific that are part of the California  
79 Current Large Marine Ecosystem (CCLME).

80

81 There is parallel evidence that marine animals host diverse microbiomes (Pfister et al. 2010,  
82 2014b, Miranda et al. 2013, Moulton et al. [2016](#)) as well as stimulate phototrophs with excreted  
83 nitrogen (Taylor and Rees 1998, Plaganyi and Branch 2000, Bracken 2004). Incubating seawater  
84 or sediment separate from the natural environment has provided controlled estimates of single  
85 nitrogen transformations (e.g. Yool et al. 2007). However, a principle challenge has been  
86 quantifying in situ the simultaneous nitrogen transformations that characterize natural  
87 communities. Animal species may host nitrogen-metabolizing microbes while phototrophs in the  
88 same environmental setting simultaneously compete for the animals' excreted ammonium. Light  
89 levels controlling phototroph ammonium uptake may thus mediate nitrogen transformations.

90

91 Stable isotope enrichment experiments are an established methodology for quantifying nitrogen  
92 processing in marine environments where the transfer of a tracer between source and product  
93 pools is measured over time (Glibert et al. 1982, Lipschultz 2008). Typically, these assays are  
94 done on seawater or sediments (e.g. review by Beman et al. 2011), though there are some  
95 examples where an organism is assayed (e.g. Heisterkamp et al. 2013). One acknowledged  
96 challenge of these experiments is the simultaneous occurrence of multiple processes that can  
97 dilute isotopically the source pool. For example, in a  $^{15}\text{NH}_4$  tracer to estimate nitrification, the  
98 ammonium tracer could be diluted by the production of unlabeled  $\text{NH}_4^+$  by remineralization or  
99 the microbial reduction of nitrite. Without accounting for isotope dilution, rates of transfer of  
100  $\text{NH}_4^+$  to other pools would accordingly be underestimated. To assess the importance of isotope  
101 dilution in our tidepool systems we compare rates of nitrogen transformation using two  
102 approaches: (1) Using the previously used source-product model for a single transformation from  
103 a  $^{15}\text{N}$ -enriched source to a single product which does not account for isotope dilution (as  
104 discussed in Glibert et al. 1982, Lipschultz 2008), and (2) Using a set of 6 differential equations  
105 for modeling six different, simultaneous nitrogen processes which accounts for isotope dilution  
106 in all relevant pools as well as the passage of tracer into intermediate pools.

107

108

109 Here we quantify the influence of a common coastal marine animal, the California mussel, on the  
110 overall magnitude of and the partitioning between simultaneous nitrogen transformations, using  
111 tidepools at low tide as ‘experimental mesocosms’. We use an experimental approach to test the  
112 possible interacting roles of this animal and light on the rates of nitrogen transformations that, in  
113 particular, influence net nitrogen retention. We manipulated the presence and absence of mussels

114 and light in combination with stable isotope tracer addition to directly test their effects on  
115 nitrogen transformations. [Microbial nitrogen transformations estimated from differential](#)  
116 [equation models were](#) much higher than published rates [for which](#) rate estimates are treated  
117 singularly. We use the experiment and model [together](#) to test whether nitrogen transformations in  
118 the tidepools are elevated by mussels, inhibited by light, or affected by other environmental  
119 variables. We also test for evidence of interactions between phototrophs and nitrogen-utilizing  
120 microbes.

121

## 122 **2. Methods**

### 123 **2.1 A Model for experimental data**

124 The fates of 3 forms of inorganic nitrogen (ammonium, nitrite, nitrate) in an isolated tidepool  
125 include a variety of processes mediated by microbes and other intertidal inhabitants, and are  
126 illustrated in Fig 1. For ammonium, increases in concentration (and dilution of an enriched  
127 tracer) can occur via excretion by animals and is represented by remineralization ( $m$ ).

128 Phototrophs, both prokaryotic and eukaryotic, can assimilate ammonium and nitrate leading to  
129 decreases in concentration, designated by uptake ( $u$ ). Microbial transformations include  
130 ammonium oxidation to nitrite ( $h$ ), nitrite oxidation to nitrate ( $x$ ), nitrate reduction to nitrite ( $y$ ),

131 and nitrite reduction to ammonium ( $r$ ). [Remineralization,  \$m\$ , does not depend on any state](#)

132 [variable](#), whereas the other parameters are first-order rate constants in which the rate is the

133 product of the [parameter](#) and the appropriate concentration. Because they are the first steps

134 toward denitrification (production of  $N_2$ ), both nitrite and nitrate reduction should be favored

135 under low oxygen conditions. Denitrification, in its entirety, [and](#) anammox (which combines

136 ammonium and nitrite to produce  $N_2$ ), are not explicitly modeled. Experiments to date that have

137 utilized gas-tight chambers have not detected nitrogen loss via N<sub>2</sub> gas production (unpublished  
138 data) and we thus assume that nitrate and nitrite reduction were incomplete with respect to N<sub>2</sub>  
139 production and consistent with nitrogen retention in the system.

140

141 The traditional source-product model generally involves estimating an average rate from time 0  
142 to time t (Lipschultz 2008) and has the general form:

$$143 \text{ Rate} = (R_k(t) - R_k(0)) / [(R_s(0) - R_k(0)) * \Delta t] * [\bar{k}] \quad \text{Eq. (1)}$$

144 where  $k$  is the sink or product at time  $t$  (or the average  $\bar{k}$ ),  $s$  is the source. Average product  
145 concentration over the source of the experiment is  $\bar{k}$  and  $R$  designates the atom % (<sup>15</sup>N/(<sup>15</sup>N  
146 +<sup>14</sup>N) x100) of either the source or product component at the beginning of the experiment (0) or  
147 the end (t). Equation (1) can be used to estimate individual nitrogen transformation rates  
148 assuming little change in  $R_k$ . For example, ammonium oxidation to nitrite ( $h$  in Fig 1) is  
149 estimated by adding <sup>15</sup>NH<sub>4</sub> and monitoring the <sup>15</sup>N enrichment in nitrite. Nitrate reduction to  
150 nitrite ( $y$ ) is estimated by adding <sup>15</sup>NO<sub>3</sub>, and monitoring the <sup>15</sup>N enrichment in nitrite.

151

152 A recognized shortcoming of Eq. (1) is that multiple simultaneous processes (e.g. Fig. 1) can  
153 change the concentration and isotopic composition of source and product nitrogen pools  
154 (Lipschultz 2008). Resolving the influence of multiple, contemporaneous nitrogen  
155 transformations requires a new approach that accounts for their influence over time on the  
156 distribution of <sup>15</sup>N tracer. Pather et al. (2014) used an isotope dilution model (Glibert et al. 1982)  
157 that included simultaneous ammonium remineralization and uptake. Here, we extend that  
158 approach by constructing a differential equation model that includes all six simultaneous  
159 processes described above. We then fit our model to observed time-dependent changes in the

160 concentrations and isotopic composition of ammonium, nitrite and nitrate. Because microbial  
161 metabolisms ( $h$ ,  $x$ ,  $y$ ,  $r$ ), phototroph uptake ( $u$ ), and animal metabolism ( $m$ ) should be occurring  
162 simultaneously, a major advantage of the differential equation model is that it estimates  
163 [simultaneous](#) multiple processes.

164  
165 In our differential equation model (Fig. 1), three differential equations describe how the  
166 concentrations of ammonium [A], nitrite [Ni], and nitrate [Na] in  $\text{nmol L}^{-1}$  change with time as a  
167 function of the 6 nitrogen flux terms.

$$\frac{d[A]}{dt} = m + r[Ni] - h[A] - 2u[A] \quad (\text{Eq. 2})$$

$$\frac{d[Ni]}{dt} = h[A] + y[Na] - r[Ni] - x[Ni] \quad (\text{Eq. 3})$$

$$\frac{d[Na]}{dt} = x[Ni] - y[Na] - u[Na] \quad (\text{Eq. 4})$$

168 Ammonium remineralization ( $m$ ) is assumed to be a constant rate independent of ammonium  
169 concentration. However, the other fluxes are first-order dependent on source concentrations with  
170  $h$ ,  $u$ ,  $r$ ,  $x$ , and  $y$  as the rate constants for ammonium oxidation, phototroph uptake, and nitrite  
171 reduction, nitrite oxidation, and nitrate reduction respectively. We also assumed that ammonium  
172 uptake ( $2u$ ) was double that of nitrate uptake, a ratio reflecting the relative energetic ease of  
173 ammonium uptake by phototrophs (Thomas and Harrison 1985, Dortch 1990) and supported by  
174 measurements (Hurd et al. 2014). This 2:1 multiplier fit the data well across tidepool  
175 experiments ([see below](#)) and provided better fits than a higher or lower multiplier for  
176 ammonium:nitrate uptake. We note, however, that there are likely among species differences in  $u$   
177 and its multiplier for ammonium uptake that need further study in marine macroalgae. By using  
178 only  $u$  to represent both phototrophic ammonium and nitrate uptake, we avoided an increase in



179 the number of parameters and we simplified our model fitting routine. Although we initially set  $u$   
 180 to zero at night, we found that model fits were best when we let the model fit some phototrophic  
 181 uptake at night, a phenomenon consistent with the observation that dark photosynthesis via  
 182 carbon storage occurs in intertidal macroalgae (Kremer 1981). We excluded the uptake term ( $u$ )  
 183 from nitrite dynamics because nitrite is at much lower relative abundance compared with  
 184 ammonium and nitrate and is not known as a preferred nitrogen source for phototrophs. Finally,  
 185 we note that  $u$  could also include uptake by heterotrophic bacteria. Based on the results presented  
 186 below, however, phototrophic uptake appeared to dominate the  $u$  term. Given that nitrate and  
 187 nitrite reduction are favored only at low  $O_2$  concentration, it might be presumed that reducing  
 188 processes are insignificant. However, tidepools with their natural complement of animals and  
 189 algae, sediment, and small nooks and crannies likely have a high degree of spatial heterogeneity  
 190 in oxygen and our results show significant rates of these processes.

191

192 Three equations model the time-varying concentrations ( $\text{nmol } ^{15}\text{N L}^{-1}$ ) of  $^{15}\text{N}$  ammonium  
 193 ( $n15A$ ), nitrite ( $n15Ni$ ), and nitrate ( $n15Na$ ).  $^{15}\text{NH}_4$  is diluted over time by remineralization ( $m$ )  
 194 in the naturally occurring ratio of  $^{15}\text{NH}_4$  to  $^{14}\text{NH}_4$  of 0.00366. All other fluxes transfer  $^{15}\text{N}$  from  
 195 source to product in proportion to total nitrogen transfer:

$$\frac{d[n15A]}{dt} = m(0.00366) + r[n15Ni] - h[n15A] - 2u[n15A] \quad (\text{Eq. 5})$$

$$\frac{d[n15Ni]}{dt} = h[n15A] + y[n15Na] - r[n15Ni] - x[n15Ni] \quad (\text{Eq. 6})$$

$$\frac{d[n15Na]}{dt} = x[n15Ni] - y[n15Na] - u[n15Na] \quad (\text{Eq. 7})$$

196 All parameter definitions are summarized in Table 1. Although isotope fractionation is known to  
 197 occur for these nitrogen transformations, their magnitude is small compared to experimental

198 enrichment values (e.g. Granger et al. 2008, Casciotti 2009, Granger et al. 2010, Swart et al  
199 2014). We thus assumed that fractionation was insignificant in the context of this experimental  
200 manipulation and that first order reaction rate coefficients were equivalent for  $^{14}\text{N}$  and  $^{15}\text{N}$   
201 containing forms of DIN.

202

203 We solved Eqs. 2-7 for the 6 parameters ( $m, u, h, x, r, y$ ) simultaneously, by finding the best fits  
204 to the concentration and  $^{15}\text{N}$  data for each experimental tidepool (see Sect 2.3). We further  
205 leveraged this experimental approach by comparing results for experiments carried out during  
206 the day and at night, and in tidepools with and without mussels, generating multiple parameter  
207 estimates and analyzing how they varied with environmental variables. To do so, we conducted  
208 all 4 experimental variants in each tidepool over the course of 2 months (daytime  $^{15}\text{NH}_4$ ,  
209 nighttime  $^{15}\text{NH}_4$ , daytime  $^{15}\text{NO}_3$ , nighttime  $^{15}\text{NO}_3$ ) (see Methods below).

210

## 211 **2.2 Isotope enrichment experiments in tidepools**

212 All isotope enrichment experiments were done in tidepools at Second Beach, a rocky north-  
213 facing bench 2 km east of Neah Bay, WA, USA (48°23' N, 124° 40' W) within the Makah Tribal  
214 Reservation. The experimental methods were described in [the](#) Pather et al (2014), but are briefly  
215 reviewed here. Since 2002, California mussels (*Mytilus californianus*) have been removed from  
216 5 tidepools while 5 others have remained as controls; in the year of this study, mussels were  
217 hand-removed (by cutting byssal threads) a month prior to the experiment to eliminate any  
218 biogeochemical signal of our presence. Besides this single perturbation, the pools have been left  
219 intact and contain a natural assemblage of macroalgae, microphytobenthos, surfgrasses  
220 *Phyllospadix scouleri* and *P. serrulatus* and macrofauna such as limpets, anemones, and fishes;

221 the tidepools were 1.2 to 1.5 m above Mean Lower Low Water (MLLW) (Pfister 2007). The  
222 isolation of these tidepools for 5 to 6 hours during the low tide excursions both during daylight  
223 and nighttime hours during the summer of 2010 made it ideal to use the tidepools as intact  
224 mesocosms and probe the nitrogen transformations in natural ecosystems. [Here we extend the](#)  
225 [analysis of Pather et al. \(2014\) by quantifying nitrogen cycling that is due to microbial](#)  
226 [transformations. We also augment their <sup>15</sup>N ammonium addition results with results for <sup>15</sup>N](#)  
227 [nitrate addition.](#)

228

229 Four <sup>15</sup>N enrichment experiments within these 2 groups of tidepools provided a test of the fate of  
230 ammonium and nitrate, as a function of day and night hours (e.g. with and without  
231 photosynthesis), and the presence and absence of animals. The ‘ $\delta$ ’ notation is standard for  
232 expressing relatively low levels of <sup>15</sup>N enrichment as well as variations in natural abundance <sup>15</sup>N  
233 ( $\delta^{15}\text{N}\text{‰} = [(R_{\text{sample}} - R_{\text{atmN}_2}) / R_{\text{atmN}_2}] \times 1000$ ) and is used here for expressing measured values. For  
234 model calculations,  $\delta^{15}\text{N}$  values were first converted to <sup>15</sup>N/<sup>14</sup>N ratios and then to the  
235 concentration of <sup>15</sup>N by multiplying by the corresponding nutrient concentration. The four  
236 enrichment experiments included a target 1000‰ enrichment of either  $\delta^{15}\text{NH}_4$  (added as 0.05M  
237 ammonium chloride, <sup>15</sup>NH<sub>4</sub>Cl) or  $\delta^{15}\text{NO}_3$  (added as 0.05M sodium nitrate, Na<sup>15</sup>NO<sub>3</sub>), thus  
238 doubling either the <sup>15</sup>N-NH<sub>4</sub><sup>+</sup> or <sup>15</sup>N-NO<sub>3</sub><sup>-</sup> concentration during both a daytime low tide (25 Jun  
239 2010, ~0715 to 1245 and 27 Jun 2010, ~0730 to 1300h), and a nighttime low tide (~2000 to  
240 0145h on 13-14 Aug 2010 and 2150 to 0400h on 15-16 Aug 2010). [Although only 2 days](#)  
241 [separated the daytime ammonium and nitrate experiments, high tide flushed these areas 3 times](#)  
242 [and our initial samples for the nitrate enrichment experiment corrected for any residual <sup>15</sup>N.](#) A  
243 six-week interval between daytime and nighttime experiments was necessary due to the timing of

244 low tides in the region. Strong nighttime low tide excursions only occurred in August, while  
245 daytime spring tides are ideal in June. These two experimental timepoints showed similar  
246 starting tidepool seawater temperatures (11.4 in Jun versus 11.3°C in Aug) and similar DIN  
247 concentrations (20.0 and 23.1  $\mu\text{molL}^{-1}$ ). Both ammonium and nitrate concentrations in tidepools  
248 are typically high ( $>10 \mu\text{molL}^{-1}$ ) minimizing any concentration-related effects from tracer  
249 addition. Tidepool volume had been estimated previously with addition of a known amount of  
250 blue food coloring (e.g. Pfister 1995) and averaged 57.1 L with a range of 26.1 to 97.4 L.  
251 Deviations in our target of 1000‰ initial enrichment occurred due to natural variation in nutrient  
252 concentrations at the time of tracer addition, as well as error in tidepool volume estimates.

253

254 | In all experiments, a water sample prior to tracer addition was collected to verify natural  
255 | abundance isotope levels ( $T_0$ ). After tracer solution was added and stirred, a sample of water was  
256 | immediately taken to estimate actual initial enrichment ( $T_1$ ). A second sample was taken ~ 2 h  
257 | later ( $T_2$ ), followed by a final sample after ~5 h ( $T_3$ ), resulting in 3 samples to estimate the time  
258 | course of concentration and  $^{15}\text{N}$  enrichment in  $\text{NH}_4^+$ ,  $\text{NO}_2^-$ , and  $\text{NO}_3^-$  in tidepool water. Although  
259 | it would have been ideal to have greater than 4 samples to precisely describe the time course of  
260 |  $^{15}\text{N}$  through time, this number represented a cost-effective number across ten replicate tidepools  
261 | and four experiments, and minimized investigator disturbance during the experiment. For each  
262 | sample, we filtered ~180 ml of tidepool water through a syringe-filter (Whatman GF/F) into  
263 | HDPE bottles, which we kept frozen until analysis. All nutrient concentrations were analyzed at  
264 | the University of Washington Marine Chemistry lab, while isotope determinations were done at  
265 | University of Massachusetts, Dartmouth. Methodology for nutrient and isotopic composition was  
266 | reported previously (Pather et al. 2014, Pfister et al. 2014a). [Briefly, nitrogen stable isotopes of](#)

267 [ammonium were measured according to a modified version of the NH<sub>4</sub> oxidation method](#)  
268 [detailed in Zhang et al. \(2007\). NH<sub>4</sub> is oxidized to nitrite using a hypobromite solution and then](#)  
269 [reduced to N<sub>2</sub>O using a sodium azide-acetic acid reagent before analysis on an IRMS \(isotope](#)  
270 [ratio mass spectrometer\). The stable isotope ratios of nitrate were measured by cadmium](#)  
271 [reduction to nitrite, followed by reaction with azide to N<sub>2</sub>O \(McIlvin and Altabet 2005\).](#)  
272 Nighttime sampling was done using headlamps, and took only 2-5 min, resulting in negligible  
273 illumination near tidepools. Tidepool oxygen, pH and temperature (Hach HQ4D) were also  
274 collected at ~ 2 h intervals throughout the experiment, and all tidepools had a HOBO  
275 temperature logger recording at 10 min intervals.

276

### 277 **2.3 Fitting the Differential Equation Model to Data**

278 Each tidepool experiment had 3 time points for nitrogen isotope composition and concentration,  
279 [making it possible to fit](#) our model [to the data](#) for each experiment. We solved our differential  
280 equations using the ‘ode’ function of R (in the deSolve R package, Version 3.1.0, [www.r-](http://www.r-project.org)  
281 [project.org](http://www.r-project.org), Soetaert et al. 2012). The fit of our model to the data was calculated with the  
282 ‘modCost’ function of the FME package, which calculates the sum of the squared errors between  
283 the model and the data. We fit the model to the data using the ‘modFit’ function that uses a  
284 Levenberg-Marquardt minimization algorithm (Soetaert et al. 2010). As we did this estimation  
285 for each experiment, not treatment averages, we were able to examine stoichiometric  
286 relationships between nitrogen fluxes maintained at the scale of individual tidepools. [Although](#)  
287 the fitting routine always converged, we further tested the robustness of the fitting routine in  
288 several ways. First, we randomly varied the initial values for the parameters 100 times, drawing  
289 initial values from uniform distributions that allowed the parameter estimates to vary over

290 several orders of magnitude (between 0 to 10). Because the  $m$  parameter was not first order and  
291 logically could be large, it ranged from 0 through  $10^6$ . In all cases, the sum of squares of at least  
292 the best 10 parameter sets were within  $10^{-3}$  (or less than 1-3% different), strongly suggesting that  
293 our fitting routine found the best parameter sets. As a second test of the model, we calculated net  
294 production or loss of  $^{15}\text{N}$  by comparing the resulting total moles of  $^{15}\text{N}$  from the observed values  
295 in each tidepool at the end of each experiment to the corresponding best-fit parameter estimates.

296

297 Finally, we compared our differential equation model with the source-product model shown in  
298 Eq. (1). Because our tracer experiments had 3 time points ( $T_1, T_2, T_3$ ), we used the interval from  
299  $T_1$  to  $T_2$  to estimate the first paths for the transfer of tracer via oxidation or reduction ( $h$  and  $y$ )  
300 and the interval from  $T_2$  to  $T_3$  to estimate the second oxidation or reduction process ( $x$  and  $r$ ). In  
301 this way, there was time for the tracer to become incorporated into nitrite before we estimated  
302 the transformation rates of nitrite oxidation ( $x$ ) in the case of enriched ammonium addition, or  
303 reduction ( $r$ ) in the case of enriched nitrate addition. Focusing our source-sink estimation on  
304 these intervals allowed us to [produce the most accurate](#) rate estimates from the source-sink  
305 model.

306

307 We measured multiple responses in our experimental manipulation. We analyzed all responses  
308 with a linear mixed effects model using tidepool as a random effect and testing for a statistical  
309 interaction between mussel presence and light (R, [www.r-project.org](http://www.r-project.org)).

310

### 311 **3. Results**

#### 312 **3.1 Isotope Patterns in experiments**

313 After approximately 5 to 6 hours of isolation at low tide, results were dependent on both the  
314 presence of mussels and the availability of sunlight (Fig. 2, Table 2). Ammonium concentration  
315 was overall greater with mussels and during the day, and oxygen, temperature and pH all tended  
316 to be greater during the day. Tidepool pH was lower at night ( $p < 0.05$ ) and possibly lower with  
317 mussels ( $0.10 < p < 0.05$ ). The dynamics of  $\delta^{15}\text{N}_{\text{NH}_4}$ ,  $\delta^{15}\text{N}_{\text{NO}_2}$ , and  $\delta^{15}\text{N}_{\text{NO}_3}$  over the course of the  
318 experiment revealed transfer of the tracer isotope and thus the action of microbial nitrogen  
319 transformations. When  $^{15}\text{N}\text{-NH}_4^+$  was added, enrichment in  $\delta^{15}\text{N}_{\text{NO}_2}$ , and  $\delta^{15}\text{N}_{\text{NO}_3}$  was seen,  
320 though the presence of mussels diluted the  $\delta^{15}\text{N}_{\text{NH}_4}$  signal. Similarly, enrichment in  $\delta^{15}\text{N}_{\text{NH}_4}$  and  
321  $\delta^{15}\text{N}_{\text{NO}_2}$  followed the addition of  $^{15}\text{N}\text{-NO}_3^-$  ([Appendix A1](#)).

322

### 323 **3.2 The differential equation model estimates nitrogen transformation rates**

324 The advantage of using our tidepool experiments is that they contain the full range of actual  
325 biological components and environmental fluctuations; but as they vary in the composition of  
326 these components they also show individual differences. We thus fit the model to each tidepool  
327 individually, rather than a mean value, allowing any influences due to environmental differences  
328 to be incorporated into parameter estimates. ODE model predictions were generally highly  
329 concordant with the observed nutrient and isotope data measured for each tidepool experiment  
330 (Fig. 3). [Our estimates of  \$\mu\$  assumed that phototrophic ammonium uptake was twice that of](#)  
331 [nitrate uptake, an assumption that generally fit the observed data well \(Appendix A2\).](#) In addition  
332 to providing a good visual fit to the data for each tidepool (Fig. 3), the estimated parameters  
333 predicted well the total amount of  $^{15}\text{N}$  measured at the end of the experiment (Fig. 4). Individual  
334 results deviated by as much as  $\pm 20 \text{ nmol L}^{-1}$ , but the estimated and measured quantities were  
335 very similar and indicated the model showed no bias toward producing or consuming  $^{15}\text{N}$  (Fig.

336 3). The mean  $^{15}\text{N}$  was 122.3 nmol total in the ammonium enrichment experiments and 158.6  
337 total in the nitrate enrichment experiments, indicating that deviations were relatively modest  
338 (<16%), especially given the multiple sources of variability in collecting and analyzing tidepool  
339 seawater.

340

### 341 **3.3 The significant effect of mussels and light on nitrogen processing**

342 The rates of ammonium remineralization in tidepools that we estimated with our ODE model  
343 were greatest during the day when mussels were present, as was the uptake of ammonium (Fig.  
344 2). In turn, all nitrogen metabolisms showed the greatest rates in the presence of mussels (Fig. 5,  
345 Table 3, Table 4). Further, all nitrogen transformations were greatest during the day with the  
346 exception of nitrate reduction. For ammonium and nitrite oxidation ( $hA$  and  $xNi$ ), rates increased  
347 an order of magnitude in the presence of mussels and during the day. As with all the microbial  
348 transformations, nitrogen uptake attributed to all photosynthesizing species, from microalgae to  
349 macroalgae and seagrasses, was greatest with mussels and also during the day. When we tallied  
350 the percentage of ammonium flux due to microbes (nitrification + nitrite reduction) relative to all  
351 the ammonium flux per tidepool ( $(\overline{hA} + \overline{rNi}) / (\overline{hA} + \overline{rNi} + 2u)$ , Table 3), we found that microbial  
352 ammonium flux accounted for 32% of all ammonium flux when mussels were present and it was  
353 daylight. Similarly, microbial nitrate flux was 61.4% of all nitrate flux. Although inorganic  
354 nitrogen concentrations were always greater with mussels (Fig. 2), the rates of nitrogen  
355 transformations we estimated were greatly affected by time of day and mussels (Figs. 2, 5,  
356 statistical summary in Table 4).

357

### 358 **3.4 Comparing the ODE model to single rate, source-sink models**



359 All rates of nitrogen transformation during the day and with mussels estimated with our  
360 differential equation model (Eqs. 2-7) were greater than estimated by the traditional source-  
361 product model (Fig. 5, Table 4). The ODE model always produced an estimate of the  
362 ammonium oxidation rate far greater than that of the source-product model, particularly during  
363 the day. The ammonium oxidation rate estimated with our differential equation model was  
364 uncorrelated with the estimates from the source-product model (Spearman's  $r=0.004$ , Table 4).  
365 Overall, there was little concordance between microbial nitrogen transformations estimated with  
366 the ODE model and the source-product model, as the ODE model frequently estimated higher  
367 rates (Fig. 5, Table 3).

368

### 369 **3.5 Inferences about the relationships among nitrogen processes**

370 Parameter estimates from our model allowed us to assess the potential interaction among  
371 nitrogen processes. We tested how model estimates of photosynthetic versus microbial  
372 chemolithotrophic nitrogen use were related. If competition for ammonium occurs, then  
373 ammonium oxidation ( $h$ ) could be negatively related to phototrophic ammonium uptake ( $2u$ ). To  
374 avoid correlating parameters estimated simultaneously from the same model fitting attempt, we  
375 correlated ammonium oxidation ( $hA$ ) from the  $^{15}\text{NH}_4$  enrichment with the uptake ( $u$ ) from the  
376  $^{15}\text{NO}_3$  experiments (and vice versa) and did not find a significant relationship in either case  
377 ( $r=0.320$ ,  $p=0.169$  and  $r=0.297$ ,  $p=0.200$ ). The significant and positive relationship between  
378 ammonium oxidation ( $hA$ ) and remineralization ( $m$ ) estimated from our differential equation  
379 model ( $0.656$ ,  $p<0.001$ ) [could be biologically driven. However, there are numerous reasons for](#)  
380 [underlying relationships between model parameters. As further evidence that there is an](#)  
381 [underlying statistical correlation between ammonium oxidation and remineralization,](#) we note

382 that ammonium oxidation in our ODE model was also positively related to animal  
383 remineralization estimated independently, using the simple isotope dilution model from Pather et  
384 al. (2014) ( $r=0.687$ ,  $p<0.001$ ). The positive relationship was unaffected by day or night,  
385 indicating no enhancement of ammonium oxidation when photosynthetic ammonium uptake was  
386 minimized.

387

388 Finally, we found few correlations between nitrogen transformation rates and oxygen,  
389 temperature and pH in tidepools at the end of the low tide period. Only remineralization and  
390 nitrogen uptake rates show a positive correlation with higher temperatures ( $r=0.423$ ,  $p=0.009$  &  
391  $r=0.432$ ,  $p=0.008$ , respectively), primarily eukaryotic metabolic processes that increased with  
392 temperature.

393

394

## 395 **4. Discussion**

### 396 **4.1 Animal and microbial contributions to nitrogen transformations**

397 The remineralization of ammonium, oxidation and reduction of inorganic nitrogen, and the  
398 uptake of ammonium and nitrate were all greater in tidepools with mussels versus those where  
399 mussels were removed. Mean nitrate flux due to microbial processing (the sum of microbial  
400 nitrate transformations in Table 3) ranged from 8 to 61% of the total nitrate uptake attributed to  
401 both microbes and phototrophs, with the highest values when mussels were present and it was  
402 daylight. Microbial processing accounted for an average 32% of the total ammonium flux with  
403 mussels and daylight. Processing of both nitrate and ammonium by microbial chemolithotrophs  
404 was thus significant in this rocky shore environment, and especially so when mussels were

405 present. Previous analysis of ammonium uptake in this system indicated that suspended particles  
406 (e.g. phytoplankton) in tidepool seawater account for a negligible amount of ammonium uptake  
407 (only 1-3 nmol L<sup>-1</sup> h<sup>-1</sup>) and microbial activity in tidepool seawater was an order of magnitude  
408 less than benthic microbial activity (Pather et al. 2014). Additionally, benthic algae uptake rates  
409 (estimated at ~5 x 10<sup>-4</sup> h<sup>-1</sup>, Pather et al. 2014) likely dominate the parameter *u*, though the  
410 biomass specific uptake rates for the algae in our tidepools are unknown because we would have  
411 had to destructively sample all algae to estimate this. However, published rates of ammonium  
412 uptake in red algae ranged from 15900-62000 nmol per hour for every gram of algal dry weight,  
413 while those for nitrate are 9700-28500 (Hurd et al. 2014). Thus, several individual algae could  
414 account for the uptake of nitrogen that is not microbial, and our estimates of uptake using the *u*  
415 parameter in the model are consistent with literature values (Table 3). In total, our enrichment  
416 experiments indicate that microbial transformations can be as great as and even exceed the  
417 contributions of phototrophs to nitrogen dynamics. Further, the microbial activity related to  
418 nitrogen cycling is primarily in association with benthic animals and phototrophs.

419

420 Previous genomic analyses showed that inert substrates (e.g. rocks) in tidepools with mussels  
421 host a nearly identical microbial community to those in tidepools without mussels (Pfister et al.  
422 2014b), while mussel shells themselves host a rich diversity of nitrogen-metabolizing microbial  
423 taxa (Pfister et al. 2010). Combined with the nitrogen processing rates we quantified here, these  
424 studies suggest that California mussels are loci for the microbial processing of nitrogen. Marine  
425 invertebrates as hosts for significant nitrogen processing is further supported by work with snails  
426 and other bivalves, which are demonstrated sites of nitrogen transformations including  
427 ammonium oxidation (Welsh and Castadelli 2004, Stief et al. 2013, Heisterkamp et al. 2013).

428 N<sub>2</sub>O production is also suggested for sediment-dwelling bivalves (Heisterkamp et al. 2013) and  
429 those in sealed chambers (Stief et al. 2009). Evidence for bivalves as hotspots for nutrient  
430 dynamics also includes species in river and stream environments (Atkinson & Vaughn 2014).  
431 Mussels on rocky shores can average very high densities of 4661 individuals per m<sup>2</sup> (Suchanek  
432 1979), suggesting that ammonium concentrations above mussels should be in mmol  
433 concentrations (Pfister et al. 2010). [The observation of concentrations much lower than mmol](#)  
434 [quantities](#) directly over mussel beds (Aquilino et al. 2009), and in tidepools (this study) suggests  
435 [multiple](#) N processing pathways as observed here.

436

#### 437 **4.2 Microbes contribute to nitrogen retention**

438 In high-energy coastal environments, animal regenerated ammonium could be advected by  
439 waves and currents rather than retained. Because the rates we quantified are rapid, and because  
440 tidepool habitats are high flow refugia, net retention of inorganic nitrogen in nearshore areas can  
441 result, a phenomenon that is likely to enhance local primary production. Over a diel cycle, both  
442 ammonium and nitrite oxidation and nitrate and nitrite reduction occurred, and all are processes  
443 that retain dissolved and biologically available nitrogen. Although we did not follow our tracer  
444 into all tidepool species, previous analyses showed it was readily incorporated into tidepool algae  
445 (Pather et al. 2014). Nitrogen loss processes were not quantified, though other experiments with  
446 gas-tight chambers indicated no loss of nitrogen via enriched N<sub>2</sub> gas (Pfister & Altabet  
447 unpublished data). Additionally, if the loss of <sup>15</sup>N signal was occurring due to anammox or  
448 denitrification completed to nitrogen gas, then our models would have systematically estimated a  
449 loss of <sup>15</sup>N, a result not supported by our analyses (Fig. 4). Further, phototrophic uptake of <sup>15</sup>N  
450 was the only other term in the model for nitrogen loss. Our model predictions for uptake not only

451 were robust in both day and night experiments (Fig. 4), but the uptake rates were highly  
452 consistent with measured uptake rates of marine algae (see section 4.1 above). We recognize,  
453 however, that nitrogen loss processes via the production of the greenhouse gas nitrous oxide is  
454 suggested in association with other animal species (Heisterkamp et al. 2013). Though the return  
455 of nitrogen gas to the atmosphere is a significant feature of low oxygen, open ocean areas (Ward  
456 2013) there was no evidence for it here. In this study, and in the analysis of naturally occurring  
457 nitrogen isotopes (Pfister et al. 2014), nitrogen retention is instead suggested in high-energy  
458 coastal areas, though the generality of this finding deserves further study.

459

460 Both nitrate and nitrite reduction rates were significant and are evidence for incomplete  
461 denitrification or DNRA processes thought to be occurring only at low oxygen. Even during  
462 daytime periods of high oxygen, nitrate and nitrite reduction were observed, suggesting that  
463 tidepools provide microsites where these microbial reducing processes can take place. The  
464 oxidation of ammonium and nitrite, though not positively related to final oxygen level, was  
465 greatest during the day and with mussels. Even at night when oxygen could be very low, there  
466 was sufficient ambient oxygen to permit nitrification. Thus, even though remineralization  
467 decreased at night and oxygen levels dropped, [presumably associated with decreased mussel](#)  
468 [metabolism](#), ammonium oxidation remained at an average of  $160.6 \text{ nmol L}^{-1} \text{ h}^{-1}$  in the presence  
469 of mussels.

470

471 Although competition for ammonium between nitrifiers and phototrophs is poorly understood,  
472 the preference for ammonium uptake may make it a contested resource. Sediment microalgae  
473 have been shown to be competitively superior to ammonium oxidizing bacteria, likely due to

474 higher specific uptake rates and faster growth (Risgaard-Petersen et al. 2004). Here, we found  
475 little evidence for competitive interactions for either ammonium or nitrate between  
476 photosynthetic processes and microbial chemolithotrophs. Microbial transformations in the dark  
477 did not increase, suggesting that microbial nitrogen metabolism is driven more by the stimulation  
478 of animal excretion that occurs in these tidepools during the day, perhaps because of increased  
479 tidepool temperature (Bayne & Scullard 1977). We also show no evidence of UV inhibition of  
480 nitrification (e.g. Horrigan & Springer 1990, Guerrero & Jones 1995). We note also that  
481 tidepool ammonium levels rarely were lower than several  $\mu\text{M}$ , and thus ammonium should not  
482 have been depleted and limiting unless there are depleted microsites. Further studies at low  
483 ammonium, including areas where animal regeneration is reduced and ammonium may be  
484 contested, are warranted to understand how phototrophs and chemolithotrophs interact.

485

486

### 487 **4.3 The Differential equation model captures rapid and simultaneous processes**

488 We developed the ODE model to simultaneously estimate multiple microbial transformation  
489 rates [which](#) provide a more realistic descriptor of microbial activity in nature. Our model focus  
490 on the rates of simultaneous nitrogen transformations assures that it is general and applicable to  
491 any system. A key result here is that rate estimates from the differential equation model were  
492 often much greater than those from the source-product model (Lipschultz 2008, and Glibert  
493 1982). We suggest two reasons that our ODE estimated greater rates. First, the rapidity of  
494 microbial transformations combined with the diversity of microsites in nature mean that tracer  
495 enrichment can readily cycle through multiple products. Thus,  $^{15}\text{N}$  in ammonium may be  
496 oxidized not only to nitrite, but also to nitrate and then potentially reduced (Fig. 1). Our model

497 allows this ‘cycling’, whereas a source-sink model assumes a single source and product are  
498 involved in the estimation of  $^{15}\text{N}$  dynamics. The second reason our ODE model estimates greater  
499 rates than a source-sink is that ammonium remineralization by macrobiota in nature can rapidly  
500 dilute the  $^{15}\text{NH}_4^+$  signal. A diluted  $^{15}\text{NH}_4^+$  signal leads to underestimation of nitrogen dynamics  
501 with source-sink models, a concern noted by its authors when source-product models were  
502 derived. Here, and in Pather et al. (2014), we note that the effects of ammonium dilution were  
503 most pronounced with mussels during the day, where all microbial rates were underestimated  
504 with a source-product model. Our ODE model, in contrast, accounts for the propagation of tracer  
505 dilution by ammonium remineralization to all DIN pools, likely resulting in greater estimates for  
506 multiple nitrogen metabolisms. Indeed, our estimates of nitrification are several orders of  
507 magnitude greater than those estimated in other coastal locales with source-product models  
508 (Beman et al. 2011), allowing us to conclude that macrobiota greatly enhance rates of nitrogen  
509 transformations. We further note that the rates we quantified are characterized by high variability  
510 among tidepools, a result likely due to [both](#) measurement error for  $^{15}\text{N}$  enriched field samples,  
511 but also from natural variability in space and time for processes sensitive to species composition  
512 and environmental factors.

513

## 514 **5. Conclusions**

515 Tidepools demonstrated a range of prokaryotic and eukaryotic nitrogen metabolisms that varied  
516 with animal presence and the time of day, echoing other recent studies that demonstrate marine  
517 animals serve as sites for a diversity of nitrogen metabolisms (Fiore et al. 2010, Heisterkamp et  
518 al. 2013). The ubiquity in the coastal environment of the flora and fauna found in tidepools  
519 suggests that microbial nitrogen transformations are not unique to tidepools but a general feature

520 associated with macrobiota. The relatively high variability in the estimates of all microbial  
521 nitrogen transformations we documented is paralleled by variability in the environmental  
522 variables (e.g. oxygen, pH, temperature, species composition) that may also foster a rich mosaic  
523 of tidepool microsites for microbial biogeochemical processing and nitrogen regeneration and  
524 retention. Scaling up to the entire rocky shore ecosystem suggests a large potential role for  
525 animals in ameliorating fluctuations in upwelling and nutrient delivery. Meanwhile, ongoing  
526 animal harvest in ocean systems has greatly impacted nitrogen cycling (e.g. Maranger et al.  
527 2008), making it imperative to understand the links between nitrogen in coastal systems and  
528 animal harvest.

529

530 *Author Contribution.* CAP, MA, SP designed the experiments and CAP, MA, SP carried them  
531 out and did laboratory analyses. CAP, GD, MA developed the model. CAP prepared the  
532 manuscript with contributions from all co-authors.

533

534 *Acknowledgements.* We thank E. Altabet, S. Betcher, B. Colson, M. Kanichy, O. Moulton, P.  
535 Zaykowski for making the field experiment a success, including R. Belanger's lab efforts. K.  
536 Krogslund provided nutrient analyses and J. Larkum laboratory isotope expertise. We thank the  
537 Makah Nation for access. Funding was provided by NSF-OCE 09-28232 (CAP), NSF-OCE 09-  
538 28152 (MAA), and a Fulbright Foreign Student Award (SP).

539

540 **References**



541 [Allgeier, J. E., Layman, C. A., Mumby, P. J. and Rosemond, A. D.: Consistent nutrient storage](#)  
542 [and supply mediated by diverse fish communities in coral reef ecosystems, \*Global Change\*](#)  
543 [Biology, 20\(8\), 2459–2472, doi:10.1111/gcb.12566, 2014.](#)

544 [Aquilino, K. M., Bracken, M. E. S., Faubel, M. N. and Stachowicz, J. J.: Local-scale nutrient](#)  
545 [regeneration facilitates seaweed growth on wave-exposed rocky shores in an upwelling](#)  
546 [system, \*Limnology and Oceanography\*, 54\(1\), 309–317, doi:10.4319/lo.2009.54.1.0309, 2009.](#)

547 [Atkinson, C. L. and Vaughn, C. C.: Biogeochemical hotspots: temporal and spatial scaling of the](#)  
548 [impact of freshwater mussels on ecosystem function, \*Freshw Biol\*, 60\(3\), 563–574,](#)  
549 [doi:10.1111/fwb.12498, 2015.](#)

550 [Bayne, B. L. and Scullard, C.: Rates of nitrogen excretion by species of \*Mytilus\* \(Bivalvia:](#)  
551 [Mollusca\), \*Journal of the Marine Biological Association of the United Kingdom\*, 57\(2\), 355–](#)  
552 [369, doi:10.1017/S0025315400021809, 1977.](#)

553 [Beman, J. Michael, Chow, Cheryl-Emiliane, King, Andrew, Feng, Yuanyuan, Fuhrman, Jed A.,](#)  
554 [Andersson, Andreas and Bates, Nicholas R.: Global declines in ocean nitrification rates as a](#)  
555 [consequence of ocean acidification., \*Proceedings of the National Academy of Sciences\*, 108,](#)  
556 [208–213, 2011.](#)

557 [Bracken, M. E. S.: Invertebrate-mediated nutrient loading increases growth of an intertidal](#)  
558 [macroalga, \*Journal of Phycology\*, 40\(6\), 1032–1041, doi:10.1111/j.1529-8817.2004.03106.x,](#)  
559 [2004.](#)

560 [Casciotti, K. L.: Inverse kinetic isotope fractionation during bacterial nitrite oxidation,](#)  
561 [\*Geochimica et Cosmochimica Acta\*, 73\(7\), 2061–2076, doi:10.1016/j.gca.2008.12.022, 2009.](#)

562 [Dortch, Q.: The interaction between ammonium and nitrate uptake in phytoplankton, , 61, 183–](#)  
563 [201, 1990.](#)

564 [Dugdale, R. and Goering, J.: Uptake of new and regenerated forms of nitrogen in primary](#)  
565 [productivity, \*Limnology and Oceanography\*, 12\(2\), 196–206, 1967.](#)

566 [Fiore, C. L., Jarett, J. K., Olson, N. D. and Lesser, M. P.: Nitrogen fixation and nitrogen](#)  
567 [transformations in marine symbioses, \*Trends in Microbiology\*, 18\(10\), 455–463,](#)  
568 [doi:10.1016/j.tim.2010.07.001, 2010.](#)

569 [Fowler, D., Coyle, M., Skiba, U., Sutton, M. A., Cape, J. N., Reis, S., Sheppard, L. J., Jenkins,](#)  
570 [A., Grizzetti, B., Galloway, J. N., Vitousek, P., Leach, A., Bouwman, A. F., Butterbach-Bahl,](#)  
571 [K., Dentener, F., Stevenson, D., Amann, M. and Voss, M.: The global nitrogen cycle in the](#)  
572 [twenty-first century, \*Philosophical Transactions of the Royal Society of London B: Biological\*](#)  
573 [Sciences, 368\(1621\), 20130164, doi:10.1098/rstb.2013.0164, 2013.](#)

574 [Galloway, J. N., Townsend, A. R., Erisman, J. W., Bekunda, M., Cai, Z., Freney, J. R.,](#)  
575 [Martinelli, L. A., Seitzinger, S. P. and Sutton, M. A.: Transformation of the nitrogen cycle:](#)  
576 [recent trends, questions, and potential solutions, \*Science\*, 320\(5878\), 889–892,](#)  
577 [doi:10.1126/science.1136674, 2008.](#)

578 [Glibert, Pamela M., Lipschultz, F., McCarthy, James J. and Altabet, M. A.: Isotope dilution](#)  
579 [models of uptake and remineralization of ammonium by marine plankton, \*Limnology and\*](#)  
580 [Oceanography, 27, 639–650, 1982.](#)

581 [Granger, J., Sigman, D. M., Lehmann, M. F. and Tortell, P. D.: Nitrogen and oxygen isotope](#)  
582 [fractionation during dissimilatory nitrate reduction by denitrifying bacteria, \*Limnol.\*](#)  
583 [Oceanogr., 53\(6\), 2533–2545, doi:10.4319/lo.2008.53.6.2533, 2008.](#)

584 [Granger, J., Sigman, D. M., Rohde, M. M., Maldonado, M. T. and Tortell, P. D.: N and O](#)  
585 [isotope effects during nitrate assimilation by unicellular prokaryotic and eukaryotic plankton](#)

586 [cultures, \*Geochimica et Cosmochimica Acta\*, 74\(3\), 1030–1040,](#)  
587 [doi:10.1016/j.gca.2009.10.044, 2010.](#)

588 [Guerrero, M. A. and Jones, R. D.: Photoinhibition of marine nitrifying bacteria: wavelength-](#)  
589 [dependent response., \*Mar Ecol Prog Ser\*, 141, 183–192, 1995.](#)

590 [Heisterkamp, I. M., Schramm, A., Larsen, L. H., Svenningsen, N. B., Lavik, G., de Beer, D. and](#)  
591 [Stief, P.: Shell biofilm-associated nitrous oxide production in marine molluscs: processes,](#)  
592 [precursors and relative importance: Nitrous oxide production in shell biofilms, \*Environmental\*](#)  
593 [Microbiology](#), 15(7), 1943–1955, doi:10.1111/j.1462-2920.2012.02823.x, 2013.

594 [Horrigan, S. G. and Springer, A. L.: Oceanic and estuarine ammonium oxidation: Effects of](#)  
595 [light, \*Limnology and Oceanography\*, 35\(2\), 479–482, doi:10.4319/lo.1990.35.2.0479, 1990.](#)

596 [Hurd, C. L., Harrison, P. J., Bischof, K. and Lobban, C. S.: Seaweed ecology and physiology,](#)  
597 [Second edition., Cambridge University Press, Cambridge ; New York., 2014.](#)

598 [Kremer, B. P.: Metabolic implications of non-photosynthetic carbon fixation in brown](#)  
599 [macroalgae, \*Phycologia\*, 20\(3\), 242–250, doi:10.2216/i0031-8884-20-3-242.1, 1981.](#)

600 [Lipschultz, F.: Isotope tracer methods for studies of the marine nitrogen cycle, in \*Nitrogen in the\*](#)  
601 [Marine Environment \(2nd Edition\), edited by D. G. Capone, D. A. Bronk, M. R. Mulholland,](#)  
602 [and E. J. Carpenter, pp. 1345–1384, Academic Press, San Diego. \[online\] Available from:](#)  
603 <http://www.sciencedirect.com/science/article/pii/B9780123725226000311> (Accessed 19 May  
604 [2014\), 2008.](#)

605 [Magalhaes, C. M., Bordalo, A. A. and Wiebe, W. J.: Intertidal biofilms on rocky substratum can](#)  
606 [play a major role in estuarine carbon and nutrient dynamics, \*Mar Ecol Prog Ser\*, 258, 275–](#)  
607 [281, doi:10.3354/meps258275, 2003.](#)

608 [Maranger, R., Caraco, N., Duhamel, J. and Amyot, M.: Nitrogen transfer from sea to land via](#)  
609 [commercial fisheries, Nature Geosci, 1\(2\), 111–112, doi:10.1038/ngeo108, 2008.](#)

610 [McIlvin, M. R. and Altabet, M. A.: Chemical conversion of nitrate and nitrite to nitrous oxide for](#)  
611 [nitrogen and oxygen isotopic analysis in freshwater and seawater, Analytical Chemistry,](#)  
612 [77\(17\), 5589–5595, doi:10.1021/ac050528s, 2005.](#)

613 [Miranda, L. N., Hutchison, K., Grossman, A. R. and Brawley, S. H.: Diversity and abundance of](#)  
614 [the bacterial community of the red macroalga \*Porphyra umbilicalis\*: did bacterial farmers](#)  
615 [produce macroalgae?, edited by J. Neufeld, PLoS ONE, 8\(3\), e58269,](#)  
616 [doi:10.1371/journal.pone.0058269, 2013.](#)

617 [Moulton, O. M., Altabet, M. A., Beman, J. M., Deegan, L. A., Lloret, J., Lyons, M. K., Nelson,](#)  
618 [J. A. and Pfister, C. A.: Microbial associations with macrobiota in coastal ecosystems:](#)  
619 [patterns and implications for nitrogen cycling, Frontiers in Ecology and the Environment,](#)  
620 [14\(4\), 200–208, doi:10.1002/fee.1262, 2016.](#)

621 [Pather, S., Pfister, C. A., Post, D. M. and Altabet, M. A.: Ammonium cycling in the rocky](#)  
622 [intertidal: Remineralization, removal, and retention, Limnology and Oceanography, 59\(2\),](#)  
623 [361–372, doi:10.4319/lo.2014.59.2.0361, 2014.](#)

624 [Pfister, C. A.: Estimating competition coefficients from census data: a test with field](#)  
625 [manipulations of tidepool fishes, The American Naturalist, 146\(2\), 271–291, 1995.](#)

626 [Pfister, C. A.: Intertidal invertebrates locally enhance primary production, Ecology, 88\(7\), 1647–](#)  
627 [1653, doi:10.1890/06-1913.1, 2007.](#)

628 [Pfister, C. A., Meyer, F. and Antonopoulos, D. A.: Metagenomic profiling of a microbial](#)  
629 [assemblage associated with the California mussel: A node in networks of carbon and nitrogen](#)

630 [cycling, edited by R. DeSalle, PLoS ONE, 5\(5\), e10518, doi:10.1371/journal.pone.0010518,](#)  
631 [2010.](#)

632 [Pfister, C. A., Altabet, M. A. and Post, D.: Animal regeneration and microbial retention of](#)  
633 [nitrogen along coastal rocky shores, Ecology, 95\(10\), 2803–2814, doi:10.1890/13-1825.1,](#)  
634 [2014a.](#)

635 [Pfister, C. A., Gilbert, J. A. and Gibbons, S. M.: The role of macrobiota in structuring microbial](#)  
636 [communities along rocky shores, PeerJ, 2, e631, doi:10.7717/peerj.631, 2014b.](#)

637 [Plaganyi, E. E. and Branch, G. M.: Does the limpet Patella cochlear fertilize its own algal](#)  
638 [garden?, Marine Ecology Progress series, 194, 113–122, 2000.](#)

639 [Risgaard-Petersen, N., Nicolaisen, M. H., Revsbech, N. P. and Lomstein, B. A.: Competition](#)  
640 [between ammonia-oxidizing bacteria and benthic microalgae, Appl. Environ. Microbiol.,](#)  
641 [70\(9\), 5528–5537, doi:10.1128/AEM.70.9.5528-5537.2004, 2004.](#)

642 [Schindler, D. E., Knapp, R. A. and Leavitt, P. R.: Alteration of nutrient cycles and algal](#)  
643 [production resulting from fish introductions into mountain lakes, Ecosystems, 4\(4\), 308–321,](#)  
644 [doi:10.1007/s10021-001-0013-4, 2001.](#)

645 [Soetaert, K., Petzoldt, T. and Dresden, T. U.: Inverse modelling, sensitivity and Monte Carlo](#)  
646 [Analysis in R using package FME, Journal of Statistical Software, 33\(3\), 2010.](#)

647 [Soetaert, K., Cash, J. and Mazzia, F.: Solving Differential Equations in R, Springer Berlin](#)  
648 [Heidelberg, Berlin, Heidelberg. \[online\] Available from:](#)  
649 <http://link.springer.com/10.1007/978-3-642-28070-2> (Accessed 14 May 2015), 2012.

650 [Stief, P.: Stimulation of microbial nitrogen cycling in aquatic ecosystems by benthic macrofauna:](#)  
651 [mechanisms and environmental implications, Biogeosciences, 10\(12\), 7829–7846,](#)  
652 [doi:10.5194/bg-10-7829-2013, 2013.](#)

653 [Stief, P., Poulsen, M., Nielsen, L. P., Brix, H. and Schramm, A.: Nitrous oxide emission by](#)  
654 [aquatic macrofauna, Proceedings of the National Academy of Sciences, 106\(11\), 4296–4300,](#)  
655 [doi:10.1073/pnas.0808228106, 2009.](#)

656 [Subalusky, A. L., Dutton, C. L., Rosi-Marshall, E. J. and Post, D. M.: The hippopotamus](#)  
657 [conveyor belt: vectors of carbon and nutrients from terrestrial grasslands to aquatic systems in](#)  
658 [sub-Saharan Africa, Freshw Biol, 60\(3\), 512–525, doi:10.1111/fwb.12474, 2015.](#)

659 [Suchanek, Thomas H.: The \*Mytilus californianus\* community: studies on the composition,](#)  
660 [structure, organization and dynamics of a mussel bed., University of Washington, Seattle,](#)  
661 [PhD Thesis., 1979.](#)

662 [Swart, P. K., Evans, S., Capo, T. and Altabet, M. A.: The fractionation of nitrogen and oxygen](#)  
663 [isotopes in macroalgae during the assimilation of nitrate, Biogeosciences, 11\(21\), 6147–6157,](#)  
664 [doi:10.5194/bg-11-6147-2014, 2014.](#)

665 [Taylor, R. B. and Rees, T. A. V.: Excretory products of mobile epifauna as a nitrogen source for](#)  
666 [seaweeds, Limnology and Oceanography, 43\(4\), 600–606, doi:10.4319/lo.1998.43.4.0600,](#)  
667 [1998.](#)

668 [Thomas, T. E. and Harrison, P. J.: Effect of nitrogen supply on nitrogen uptake, accumulation](#)  
669 [and assimilation in \*Porphyra perforata\* \(Rhodophyta\), Marine Biology, 85\(3\), 269–278,](#)  
670 [doi:10.1007/BF00393247, 1985.](#)

671 [Vanni, M. J.: Nutrient cycling by animals in freshwater ecosystems, Annual Review of Ecology](#)  
672 [and Systematics, 33\(1\), 341–370, doi:10.1146/annurev.ecolsys.33.010802.150519, 2002.](#)

673 [Ward, B. B.: Nitrification, in Nitrogen in the Marine Environment, edited by D. G. Capone, D.](#)  
674 [A. Bronk, M. R. Mulholland, and E. J. Carpenter, pp. 199–262, Elsevier, Amsterdam., 2008.](#)

675 [Welsh, D. T. and Castadelli, G.: Bacterial nitrification activity directly associated with isolated](#)  
676 [benthic marine animals, \*Marine Biology\*, 144\(5\), 1029–1037, doi:10.1007/s00227-003-1252-](#)  
677 [z, 2004.](#)

678 [Worm, B., Barbier, E. B., Beaumont, N., Duffy, J. E., Folke, C., Halpern, B. S., Jackson, J. B. C.,](#)  
679 [Lotze, H. K., Micheli, F., Palumbi, S. R., Sala, E., Selkoe, K. A., Stachowicz, J. J. and](#)  
680 [Watson, R.: Impacts of Biodiversity Loss on Ocean Ecosystem Services, \*Science\*, 314\(5800\),](#)  
681 [787–790, doi:10.1126/science.1132294, 2006.](#)

682 [Yool, A., Martin, A. P., Fernández, C. and Clark, D. R.: The significance of nitrification for](#)  
683 [oceanic new production, \*Nature\*, 447\(7147\), 999–1002, doi:10.1038/nature05885, 2007.](#)

684 [Zehr, J. P. and Kudela, R. M.: Nitrogen cycle of the open ocean: from genes to ecosystems,](#)  
685 [Annual Review of Marine Science, 3\(1\), 197–225, doi:10.1146/annurev-marine-120709-](#)  
686 [142819, 2011.](#)

687  
688  
689  
690  
691  
692  
693  
694  
695  
696  
697 |

698

699 **Figure Captions**

700 Fig.1. A schematic of the nitrogen cycling model used in this study, where microbial processes  
701 include  $h$  as ammonium oxidation,  $y$  as nitrate reduction,  $r$  and  $x$  are nitrite reduction and  
702 oxidation, and  $u$  is uptake by phototrophs. These parameters are all first order rate coefficients  
703 and instantaneous fluxes are the product of the parameter and its substrate concentration.  
704 Remineralization,  $m$ , is a fixed rate. All parameters are defined in Table 1.

705

706 Fig. 2. The ending measured concentrations (in  $\mu\text{M}$ ) for ammonium, nitrite, and nitrate and the  
707 ending seawater temperature ( $^{\circ}\text{C}$ ), percent oxygen, and pH in all experimental tidepools used for  
708 the Linear Mixed Effect model results in Table 2. The right 3 panels are rates ( $\text{nmol L}^{-1} \text{h}^{-1}$ )  
709 estimated from the ODE model (Eqs. 2-7), including the estimated rate of remineralization ( $m$ )  
710 and ammonium and nitrate uptake rates in experimental tidepools. The dark horizontal line is the  
711 median, the box encompasses 50% of the data and the unfilled circles are outliers. The positive  
712 effect of mussels (shaded bars) on these 3 rates was greatest during the day. Linear mixed effects  
713 model results are in Table 4.

714

715 Fig. 3. ODE modeled  $^{15}\text{N}$  fits to the data for 6 representative tidepools in all four enrichment  
716 experiments. The ODE model was fit individually to each tidepool, designated with unique  
717 colors and symbols. Measurements are shown with symbols, while model fits at each time point  
718 are designated with lines; filled symbols with solid lines are 3 separate tidepools with mussels,  
719 while open symbols with dashed lines are 3 tidepools where mussels were removed. The lines  
720 thus represent the differential equation model (Eqs. 2-7) fit based on the modCost function using  
721 sum of squares. The symbols are the measured values (in  $\text{nmol } ^{15}\text{N L}^{-1}$ ) for the corresponding



722 tidepool at each time point; note difference in axes for nitrite. Note that although tidepools  
723 differed greatly in their nutrient dynamics, the model fits are generally close to the measured  
724 value.

725

726 Fig. 4. The relationship between the predicted total  $^{15}\text{N}$  (in  $\text{nmol L}^{-1}$ ) (by the ODE model) and  
727 observed quantity of total  $^{15}\text{N}$  (in  $\text{nmol L}^{-1}$ ) at the end of each of the  $^{15}\text{NH}_4$  and  $^{15}\text{NO}_3$  tracer  
728 experiments. The 1:1 line is shown and indicates that the model did not, on average, lead to an  
729 artificial production or loss of  $^{15}\text{N}$  and thus provided a reasonable fit to overall  $^{15}\text{N}$  dynamics.  
730 Each estimate is per tidepool and filled symbols are night, while unfilled symbols are day.

731

732 Fig. 5. The estimated rates ( $\text{nmol L}^{-1} \text{h}^{-1}$ ) of microbial nitrogen transformations based on the  
733 ODE model in the left panel (Eqs. 2-7) and the source-product model (Eq. 1; e.g. Lipschultz  
734 | 2008) [with blue shading](#) on the right. A. ammonium oxidation ( $h\bar{A}$ ), B. nitrite oxidation ( $x\bar{N}i$ ), c.  
735 | nitrate reduction ( $y\bar{N}a$ ), d. nitrite reduction ( $r\bar{N}i$ ). Note differences in axes; the differential  
736 equation model rates are shown at 4 times the scale of the source-sink model. All other legend  
737 elements as in Fig. 2.

738

739

740

741

742

743

744 Fig. 1

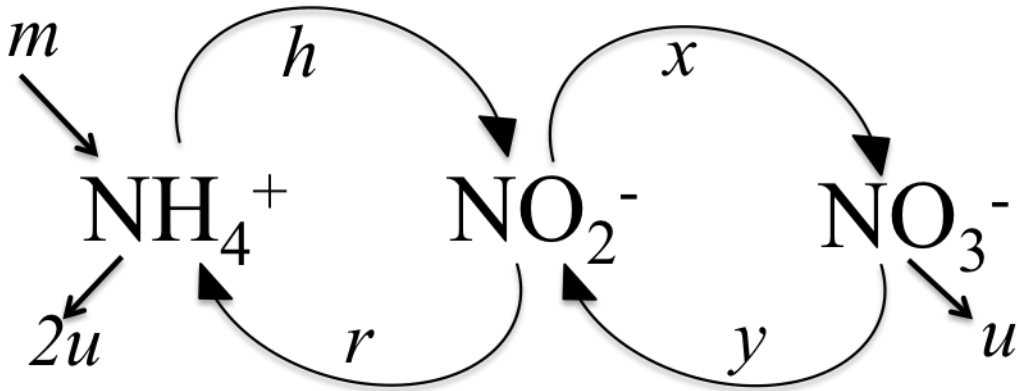

745

746

747 Fig. 2

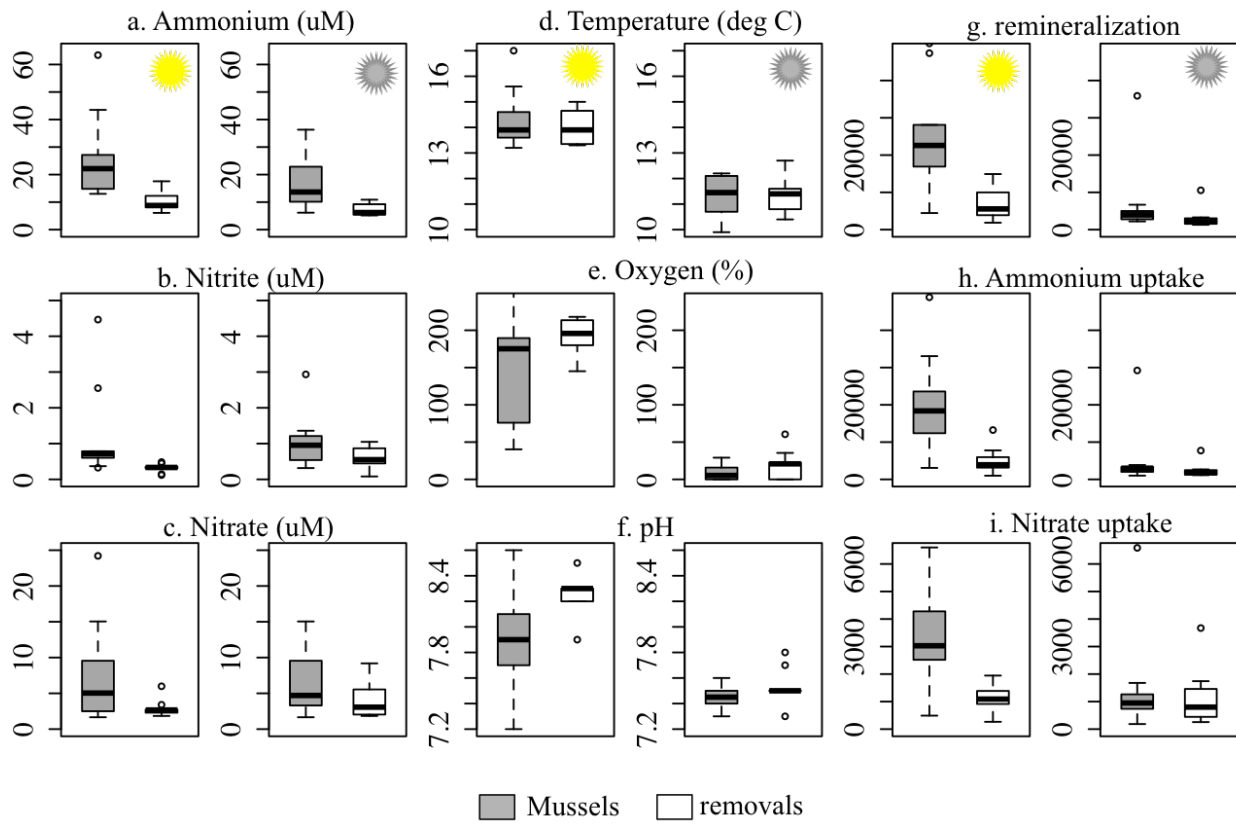

748

749

750

751

752

753

754

755

756

757

758

759

760

761 Fig. 3

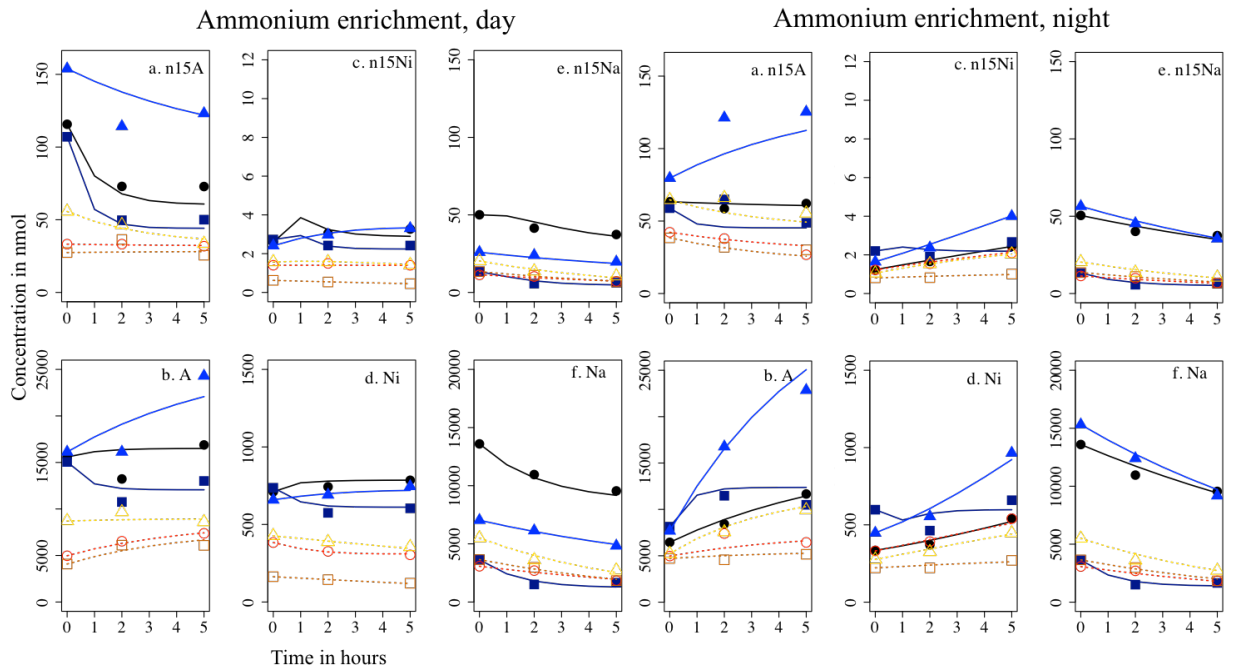

762

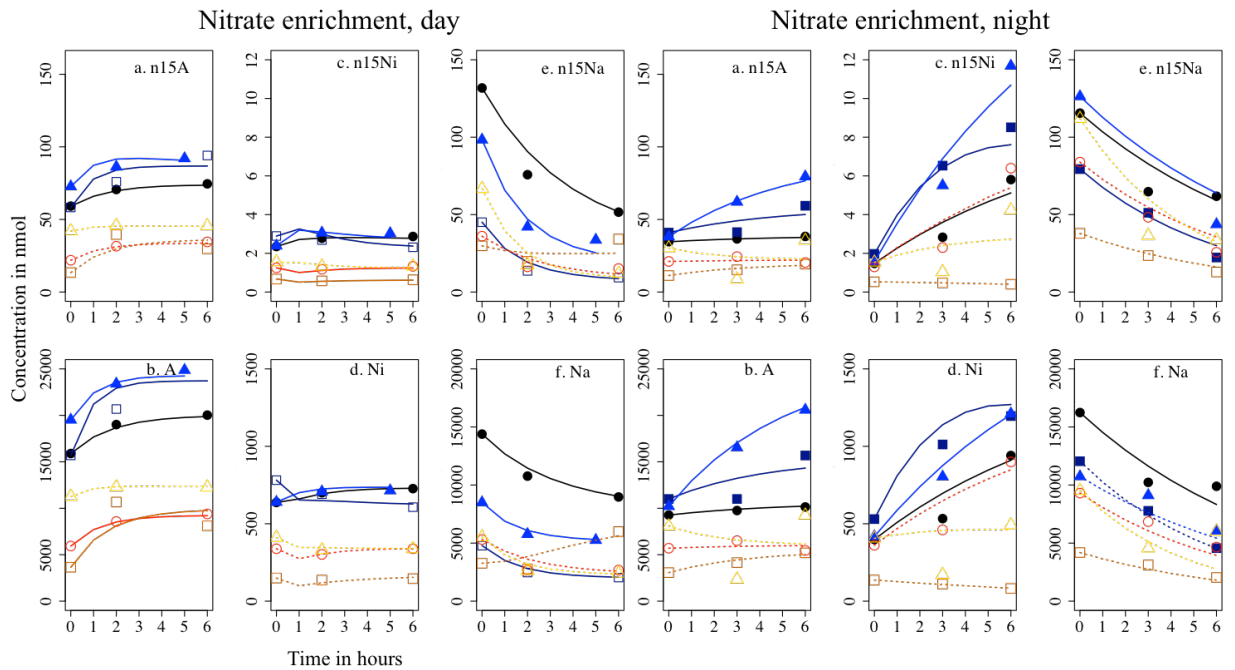

763

Fig.4

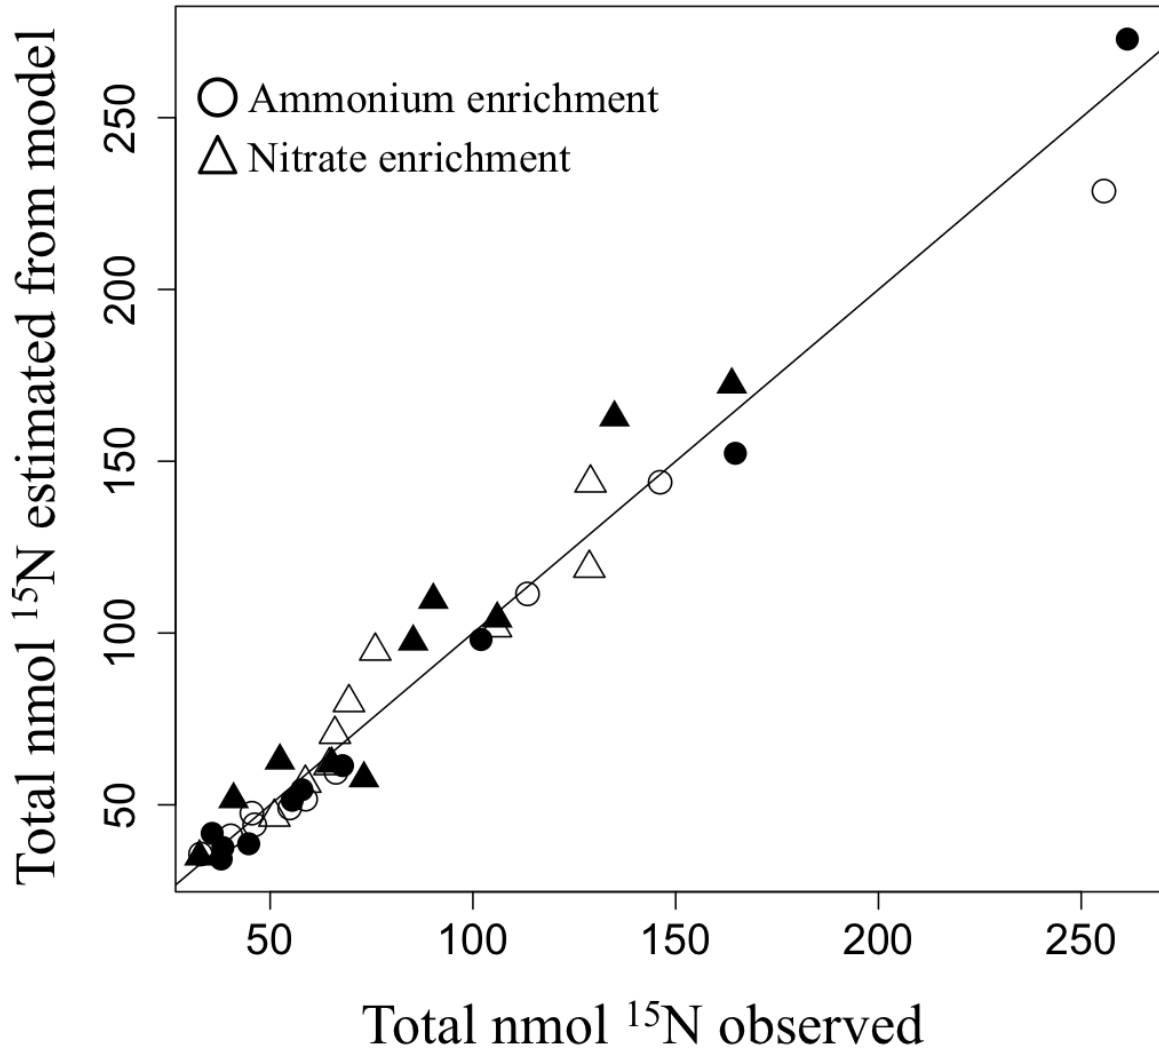

Fig. 5

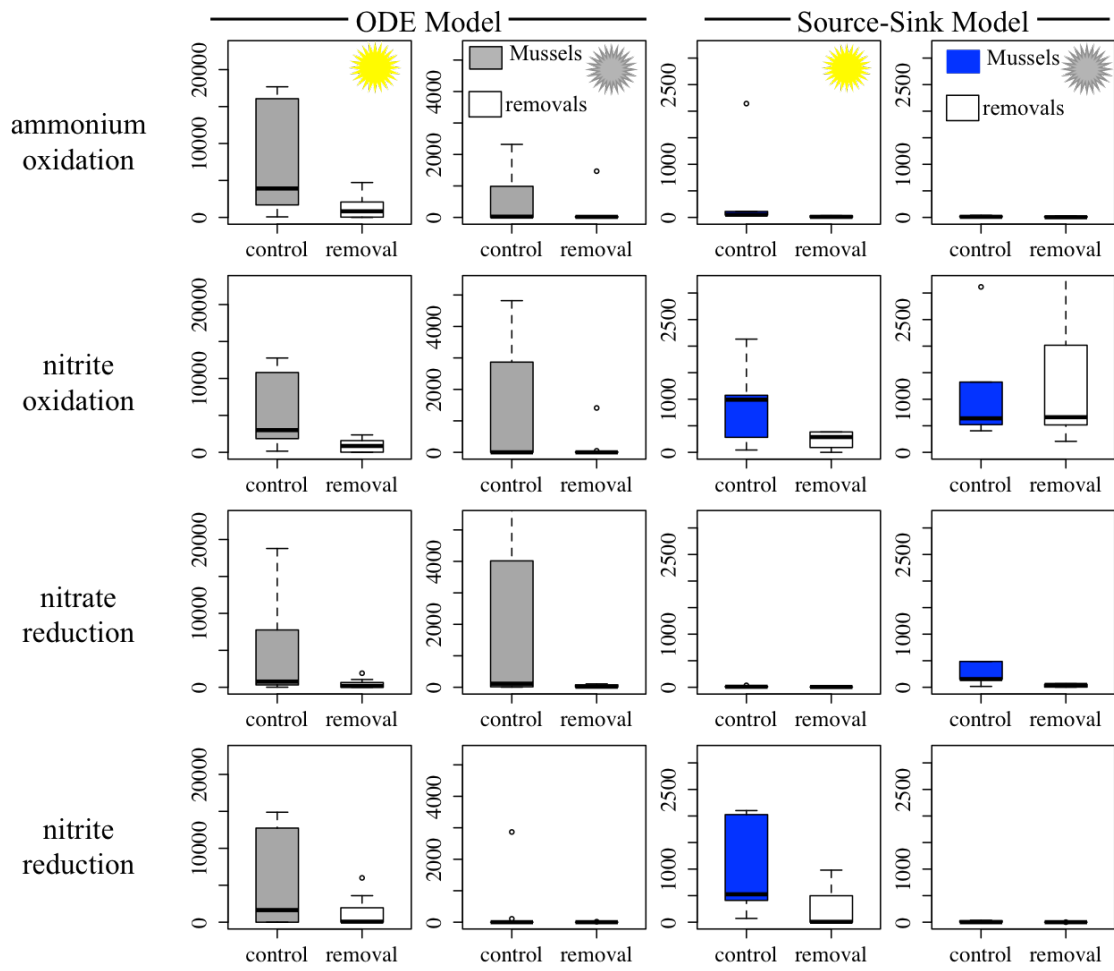

Table 1. A list of observed and modeled parameters used in this study.

| Parameter                     | Definition                                                                                                             | Method of estimation            |
|-------------------------------|------------------------------------------------------------------------------------------------------------------------|---------------------------------|
| $\delta^{15}\text{N}\text{‰}$ | $[(R_{\text{sample}} - R_{\text{atmN}_2}) / R_{\text{atmN}_2}] \times 1000$ , where R is $^{15}\text{N}/^{14}\text{N}$ | Direct experimental measurement |
| A                             | ammonium concentration ( $\text{nmol L}^{-1}$ )                                                                        | Direct experimental measurement |
| Ni                            | nitrite concentration ( $\text{nmol L}^{-1}$ )                                                                         | Direct experimental measurement |
| Na                            | nitrate concentration ( $\text{nmol L}^{-1}$ )                                                                         | Direct experimental measurement |
| n15A                          | $\text{nmol L}^{-1}$ of $^{15}\text{NH}_4$                                                                             | Direct experimental measurement |
| n15Ni                         | $\text{nmol L}^{-1}$ of $^{15}\text{NO}_2$                                                                             | Direct experimental measurement |
| n15Na                         | $\text{nmol L}^{-1}$ of $^{15}\text{NO}_3$                                                                             | Direct experimental measurement |
| $R_A$                         | Atom % ratio of $^{15}\text{NH}_4$ or $n15A/A \times 100$                                                              | Direct experimental measurement |
| $R_{\text{Ni}}$               | Atom % ratio of $^{15}\text{NO}_2$ or $n15Ni/Ni \times 100$                                                            | Direct experimental measurement |
| $R_{\text{Na}}$               | Atom % ratio of $^{15}\text{NO}_3$ or $n15Na/Na \times 100$                                                            | Direct experimental measurement |
| $m$                           | Remineralization rate ( $\text{h}^{-1} \text{ L}^{-1}$ )                                                               | Estimated with ODE model        |
| $u$                           | Uptake rate coefficient ( $\text{h}^{-1}$ )                                                                            | Estimated with ODE model        |
| $h$                           | Ammonium oxidation rate coefficient ( $\text{h}^{-1}$ )                                                                | Estimated with ODE model        |
| $x$                           | Nitrite oxidation rate coefficient ( $\text{h}^{-1}$ )                                                                 | Estimated with ODE model        |
| $r$                           | Nitrite reduction rate coefficient ( $\text{h}^{-1}$ )                                                                 | Estimated with ODE model        |
| $y$                           | Nitrate reduction rate coefficient ( $\text{h}^{-1}$ )                                                                 | Estimated with ODE model        |

Table 2. A statistical summary of the role of mussels and day versus night on resulting seawater chemistry and temperature immediately prior to tidepool re-inundation. We used linear mixed effects models with tidepool as a random effect and log-transformed estimates for nutrient concentration; t values are given; §=0.10>p>0.05, \*=p<0.05, \*\*p<0.001. The number of observations was 40.

|                                     | <b>Mussels</b> | <b>Time of Day</b> | <b>Mussels*<br/>Time of<br/>Day</b> |
|-------------------------------------|----------------|--------------------|-------------------------------------|
| <b>[NH<sub>4</sub><sup>+</sup>]</b> | 3.076*         | 4.225**            | 0.841                               |
| <b>[NO<sub>2</sub><sup>-</sup>]</b> | 2.421*         | 0.232              | 2.327*                              |
| <b>[NO<sub>3</sub><sup>-</sup>]</b> | 1.865§         | 0.327              | 1.086                               |
| <b>Percent O<sub>2</sub></b>        | 2.727*         | 6.913**            | 2.045§                              |
| <b>Temperature</b>                  | 0.784          | 9.254**            | 0.950                               |
| <b>pH</b>                           | 2.223§         | 3.716*             | 1.613                               |



Table 3. A summary of all estimated rates by treatment in the ODE model (Eqs. 2-7). Means and (se) are shown with n=10 per treatment. The contribution of microbial transformations to overall ammonium and nitrate fluxes was quantified as the percentage that microbial activity ( $\text{NH}_4^+$  oxidation,  $\text{NO}_3^-$  reduction,  $\text{NO}_2^-$  oxidation and reduction) contributed to all nitrogen uptake, including nitrogen uptake of phototrophs ( $u$ ).

| Rates<br>( $\text{nmol L}^{-1} \text{ hr}^{-1}$ )           | Mussels         |                | No Mussels     |               |
|-------------------------------------------------------------|-----------------|----------------|----------------|---------------|
|                                                             | day             | Night          | day            | night         |
| <b>Ammonium oxidation (<math>h\bar{A}</math>)</b>           | 11695<br>(5945) | 490<br>(262)   | 1435<br>(572)  | 161<br>(145)  |
| <b>Nitrite oxidation (<math>x\bar{N}i</math>)</b>           | 6980<br>(2433)  | 1904<br>(1173) | 867<br>(267)   | 148<br>(140)  |
| <b>Nitrate reduction (<math>y\bar{N}a</math>)</b>           | 4548<br>(2098)  | 2261<br>(1284) | 435<br>(197)   | 34<br>(12)    |
| <b>Nitrite reduction (<math>r\bar{N}i</math>)</b>           | 9170<br>(5281)  | 298<br>(286)   | 1228<br>(649)  | 2<br>(2)      |
| <b>Remineralization (<math>m</math>)</b>                    | 25079<br>(4554) | 7082<br>(3229) | 6471<br>(1308) | 3017<br>(868) |
| <b>Ammonium uptake (<math>2u\bar{A}</math>)</b>             | 20414<br>(4103) | 5279<br>(2676) | 4904<br>(1131) | 2405<br>(618) |
| <b>Nitrate uptake (<math>u\bar{N}a</math>)</b>              | 3206<br>(530)   | 1465<br>(585)  | 1064<br>(159)  | 1140<br>(324) |
| <b>% ammonium flux due to microbial activity (of total)</b> | 32<br>(13)      | 12<br>(10)     | 22<br>(9)      | 3<br>(2)      |
| <b>% nitrate flux due to microbial activity (of total)</b>  | 61<br>(9)       | 30<br>(18)     | 39<br>(14)     | 8<br>(4)      |

Table 4. A statistical summary of the role of mussels, day versus night, and their interaction on the rates of nitrogen transformations (in  $\text{nmol L}^{-1} \text{hr}^{-1}$ ) estimated in both our ODE models and the traditional source-product models. Linear mixed effects models using tidepool as a random effect were used on log-transformed or square-root transformed estimates from Eq. 2-7; t values are given;  $\S=0.10>p>0.05$ ,  $*=p<0.05$ ,  $**p<0.001$ . The correlation between coefficients estimated from each method is shown in the last column; no coefficients were significant. There were 40 observations for the ODE model and 20 for the source-sink model.

| Rate                                              | ODE Model Estimates |             |                       | Source-Product Model |             |                       | Corr   |
|---------------------------------------------------|---------------------|-------------|-----------------------|----------------------|-------------|-----------------------|--------|
|                                                   | Mussels             | Time of Day | Mussels x Time of Day | Mussels              | Time of Day | Mussels x Time of Day |        |
| <b>Ammonium oxidation (<math>h\bar{A}</math>)</b> | 3.131*              | 4.168**     | 2.025*                | 2.568*               | 1.970§      | 2.080§                | 0.004  |
| <b>Nitrite oxidation (<math>x\bar{N}l</math>)</b> | 2.709*              | 5.054**     | 2.232*                | 1.278                | 0.364       | 0.935                 | -0.216 |
| <b>Nitrate reduction (<math>y\bar{N}a</math>)</b> | 2.725*              | 1.205       | 0.774                 | 0.761                | 4.103*      | 1.657                 | -0.021 |
| <b>Nitrite reduction (<math>r\bar{N}l</math>)</b> | 2.032§              | 2.907*      | 1.209                 | 2.561*               | 3.365*      | 1.172                 | -0.010 |
| <b>Remineralization (<math>m</math>)</b>          | 4.139*              | 5.676**     | 2.722*                |                      |             |                       |        |
| <b>Ammonium uptake (<math>2u\bar{A}</math>)</b>   | 4.183*              | 5.478**     | 2.853*                |                      |             |                       |        |
| <b>Nitrate uptake (<math>u\bar{N}a</math>)</b>    | 3.336*              | 3.323 *     | 2.307 *               |                      |             |                       |        |

Appendix A1. Example dynamics of stable nitrogen isotopes ( $\delta^{15}\text{N}$ ) of tidepool ammonium, nitrite and nitrate for 4 separate  $^{15}\text{N}$  enrichment experiments made at different times in a single control tidepool (with mussels). We measured values prior to the addition of tracer ( $T_0$ ), followed by an immediate post-tracer measurement ( $T_1$ ), and an approximately 2-3 hour ( $T_2$ ) and a 5-6 hour ( $T_3$ ) post-tracer measurement. The left 2 panels show the addition of enriched ammonium and the resultant nitrate and nitrite enrichment, while the right 2 panels show the addition of enriched nitrate and the resultant enrichment in ammonium and nitrite. In all cases, the  $\delta^{15}\text{N}$  (‰) axis scale for the enriched source is double that of the product quantities.

[Appendix A2. We show the fit of models \(colored lines\) to data \(points\) where we varied the ratio of  \$u\$  for ammonium uptake versus nitrate uptake for a single tidepool during a daytime, ammonium enrichment. This representative scenario shows that a 2:1 ratio, where phototrophic ammonium uptake is twice that of nitrate uptake, was the best fitting model. Greater or lesser ratios did not fit the data as well. Other figure attributes as in Fig 3.](#)

Appendix A1

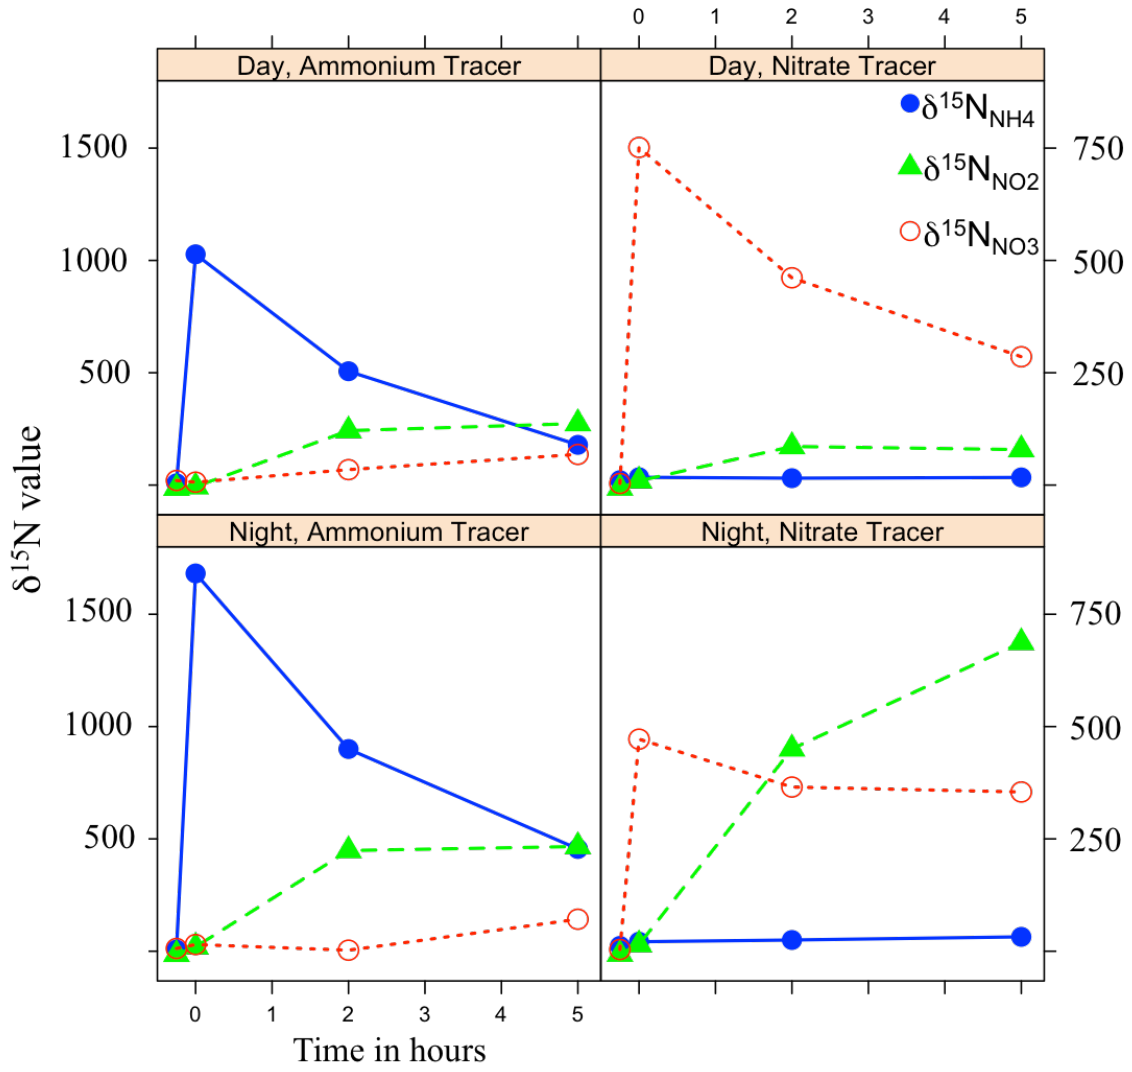

Appendix A2

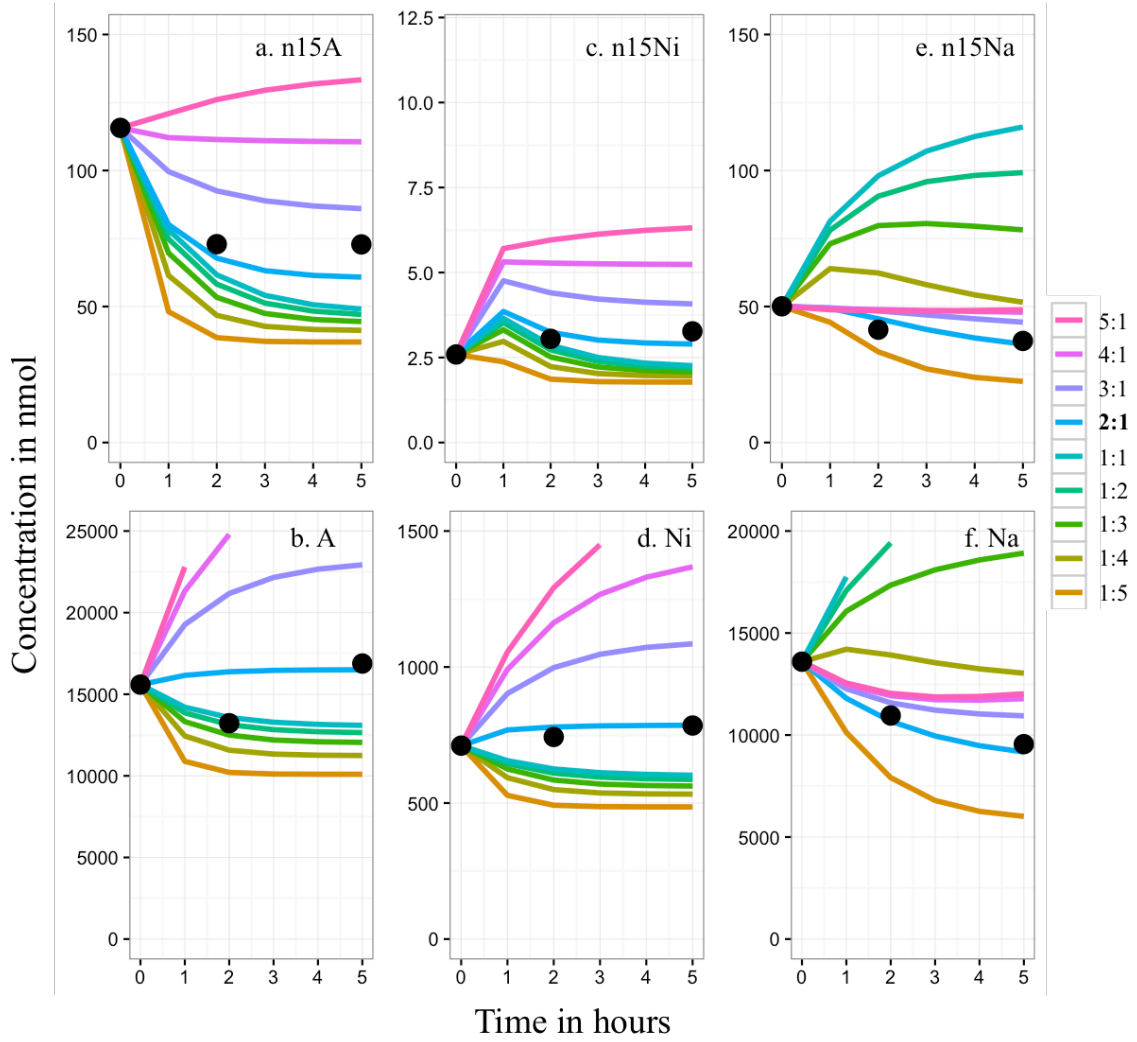

Supplement: Supplementary file [file bg-2016-81-AC2-supplement.pdf]
